# Supplementary material for: Reducing environmental impacts of metal (hydr)oxide nanoparticle embedded anion exchange resins using anticipatory life cycle assessment
Source: Royal Society of Chemistry journal article supplement (doi:10.1039/c6en00191b), 2016-01-01
Supplement: c6en00191b1.pdf [file c6en00191b1.pdf]

1           REDUCING ENVIRONMENTAL IMPACTS OF METAL (HYDR)OXIDE  
2           NANOPARTICLE EMBEDDED ANION EXCHANGE RESINS USING  
3                           ANTICIPATORY LIFE CYCLE ASSESSMENT

4

5                           SUPPLEMENTAL INFORMATION

6

7

8 August 2016

9

10

11

12

### 13 **Nanocomposite Sorbent Pollutant Removal Capacity**

14 Pollutant removal capacity for each nanocomposite formulation was determined  
15 via pseudo-equilibrium testing. For each sorbent, at least five 500 mL amber bottles were  
16 filled with synthetic groundwater spiked to 2 μM of both Cr(VI) and As(V) (100 μg/L Cr  
17 and 140 μg/L As). Synthetic groundwater was prepared as described (NSF 2007)  
18 including 20 mg/L SiO<sub>2</sub>, 180 mg/L HCO<sub>3</sub><sup>1-</sup>, 50 mg/L SO<sub>4</sub><sup>2-</sup>, 2.0 mg/L NO<sub>3</sub><sup>1-</sup>-N, 1.0 mg/L  
19 F<sup>1-</sup>, 0.04 mg/L PO<sub>4</sub><sup>3-</sup>-P, and 71 mg/L Cl<sup>1-</sup>. This challenging water matrix was used so that  
20 performance in most real groundwaters would exceed results shown here. Bottles were  
21 dosed with 30 to 450 mg/L sorbent (dry weight). The bottles were shaken and allowed to  
22 equilibrate for 7 days. Total Cr and total As were analyzed by inductively coupled plasma  
23 optical emission spectroscopy (ICPOES, Thermo iCAP6300). Other anions were  
24 analyzed by ion chromatography (Dionex ICS 2000). Isotherm data were analyzed by the  
25 Freundlich isotherm model (Equation 1) with best-fit lines through experimental data for  
26 the equilibrium oxyanion concentration, C<sub>e</sub>, and sorption capacity, q<sub>e</sub>.

$$27 \quad q_e = K * C_e^{1/n} \quad (1)$$

28

### 29 **Inventory Development**

30 The isotherm parameters modeling the pollutant removal capacity results for each  
31 of the sorbents tested is shown in SI Table 1. This was then used to calculate the required  
32 mass of sorbent to treat the functional unit. Following the original synthesis procedures,  
33 the Fe-AX has an estimated removal capacity of 490 μg Cr g<sup>-1</sup> and 172 μg As g<sup>-1</sup> at the  
34 pollutant concentration of interest. Therefore, treating 20 million gallons of water would

35 require 1,800 kg of sorbent if determined by Cr capacity or 5,300 kg if determined by As  
36 capacity. The larger was selected because it would be unacceptable to continue using the  
37 resin after As capacity was exhausted even if it was still removing Cr. The improved  
38 synthesis method for Fe-AX yielded a sorbent with 300  $\mu\text{g Cr g}^{-1}$  and 510  $\mu\text{g As g}^{-1}$   
39 removal capacity. It was therefore limited by Cr capacity and requires 3,040 kg of sorbent  
40 to treat the functional unit worth of water. The original Ti-AX had 630  $\mu\text{g Cr g}^{-1}$  and 600  
41  $\mu\text{g As g}^{-1}$  removal capacity requiring 1,500 kg sorbent. The improved Ti-AX had 510  $\mu\text{g}$   
42  $\text{Cr g}^{-1}$  and 500  $\mu\text{g As g}^{-1}$ , requiring 1,800 kg sorbent. The AX had a Cr capacity of 310  $\mu\text{g}$   
43  $\text{Cr g}^{-1}$  requiring 2,900 kg of sorbent to treat the functional unit. Another study found the  
44 metal oxide (MO) sorbent had an As capacity of 280  $\mu\text{g g}^{-1}$  (Westerhoff et al. 2005)  
45 requiring 3,200 kg to treat the functional unit. The MB option includes both the 2,900 kg  
46 of AX and the 3,200 kg of MO.

47         The bulk weight of moist resin is 1.1 kg per liter (Rohm & Haas 2008), which was  
48 used to convert the required mass of resin calculated in Section 2.1 to a volume. The  
49 contact vessel containing the sorbent was assumed to be cylindrical with a  
50 height:diameter aspect ratio of 3:1. It was more reasonable to assume a constant aspect  
51 ratio than constant diameter to stay within typical design parameters because a larger  
52 resin volume would likely be used in a larger diameter vessel to avoid an overly tall  
53 vessel. The original Fe-AX vessel was therefore estimated to be 4.2 feet in diameter and  
54 12 feet tall. The original Ti-AX vessel was 2.7 feet in diameter and 8.2 feet tall. The MB  
55 vessel was 4.4 feet in diameter and 13 feet tall.

56         Pump power demand was estimated with the vessel dimensions according to  
57 Equation 2.

58 
$$P=Q \rho g H \eta^{-1} \quad (2)$$

59 where P was pump power in kW, Q was water flow rate in gallons min<sup>-1</sup>, ρ was water  
60 density in lb ft<sup>-3</sup>, g was gravitational acceleration in ft s<sup>-2</sup>, H was headloss through the  
61 resin in ft, and η is pump efficiency. The flow rate defined in Section 2.1 was 20 MG per  
62 year, equivalent to 38 gallons min<sup>-1</sup>. Water density was 62.4 lb ft<sup>-3</sup>, and gravity was 32.2  
63 ft s<sup>-2</sup>. Headloss in the resin bed at a loading rate of 10 gal min<sup>-1</sup> ft<sup>-2</sup> is 2.25 psi per foot of  
64 bed depth (Rohm & Haas 2008), equivalent to 5.19 feet of head per foot of bed depth.  
65 Pump efficiency was assumed to be 60%. Using the separate bed depths of the three  
66 treatment options yielded required pump power for Fe-AX as 0.77 kW, 0.51 kW for Ti-  
67 AX, and 0.81 for MB. These were equivalent to 6,800 kW hr for Fe-AX, 4,500 kW hr for  
68 Ti-AX, and 7,100 for MB over the course of one year.

69 **Exclusions from System Boundary.** The system boundary excluded materials of  
70 the treatment plant itself such as piping, valves, and contactor vessels. These materials  
71 would be required for physical operation of the water treatment technology but were only  
72 loosely attributable to the choice of sorbent itself. Previous studies have indicated  
73 environmental impacts from treatment plant construction range between negligible  
74 (Raluy et al. 2005) to 4–9% (Stokes and Horvath 2006).

75 No pH control chemicals were included because the sorption capacities for each  
76 sorbent were reported for ambient pH. Each of the treatment options would perform  
77 better at depressed pH, but the relative benefit was assumed the same for each option and  
78 therefore excluded from this comparison.

79 Transportation of the resin was excluded across the life cycle, including moving  
80 the parent resin to the place of manufacture, transporting the hybrid resin to the water

81 treatment site, and hauling exhausted resin away from the site. This is because impacts  
82 would vary widely based on an arbitrary assumption for treatment location, and they  
83 would not vary greatly between scenarios. Prior studies found that material delivery for a  
84 water treatment facility contributed less than 0.6% of total emissions (Stokes and Horvath  
85 2006) and less than 2% of total global warming equivalents (Stokes and Horvath 2011).

86 Impacts associated with the water supply are excluded. Items such as well  
87 pumping, source water depletion, and distribution pumping are excluded. This LCA  
88 focused on differentiating treatment strategies, and impacts from those items would not  
89 vary.

#### 90 **Matching Impact Factors**

91 An impact factor for a general anion exchange resin was used (Anion Exchange  
92 Resin – Synthesis). It represents a strong base anion exchange resin made of polystyrene,  
93 functionalized with chloromethyl methyl ether and trimethylamine, and containing 50%  
94 moisture. The three treatment options being studied used a weak base anion exchange  
95 resin made of phenol-formaldehyde polycondensate, had undergone an unknown  
96 functionalization, and had 60% moisture content (Rohm & Haas 2008). Though not exact  
97 matches, it was deemed appropriately representative for an impact factor since they are  
98 both organic polymer structures with some form of functionalization and high moisture  
99 content.

100 The chemical inventory items correlated closely with impact factors. Sulfuric  
101 acid, ferric chloride, sodium hydroxide, methanol, and sodium chloride each had impact  
102 factors with matching CAS numbers and descriptions. The titanium oxysulfate precursor  
103 was matched with the impact factor for titanium dioxide via sulfate production process.

104 Electricity impact factors were a supply mix, medium voltage, at grid, with average  
105 United States production data.

106

### 107 **Model Sensitivity**

108 SI Figure 2 depicts results of the model sensitivity analysis relative to change in  
109 climate change potential from changes in various inputs. The following paragraphs  
110 describe changes in model results for all impact categories from changes to various  
111 model inputs.

112 Doubling the sorbent capacity, representing either an improvement in sorbent  
113 performance or a decreased competition from co-occurring constituents in the source  
114 water, had the effect of lowering final impacts by 33%–50% compared to the base case  
115 (ranges reported depending on sorbent and environmental impact category). Cutting the  
116 assumed sorbent capacity in half, representing either lower than expected sorbent  
117 performance or strong interference from co-occurring constituents in the source water,  
118 raised final impacts by 57%–100%.

119 If the functional unit doubled to 40 MG, final impacts rose by 100%–130% of the  
120 base case. If the functional unit was cut in half to 10 MG, final impacts were lowered by  
121 50%–56%.

122 If the influent pollutant concentration were lowered to 15  $\mu\text{g L}^{-1}$  instead of 20  $\mu\text{g}$   
123  $\text{L}^{-1}$ , the final impacts lowered by 27%–42%. If the influent pollutant concentration were  
124 raised to 30  $\mu\text{g L}^{-1}$ , the final impacts raised by 48%–83%.

125 If synthesis methods for Fe-AX could be improved such that only half as much  
126 methanol was required, the associated life cycle impacts reduced by 0%–12% of the base

127 case. If the synthesis methods for Ti-AX could be improved to only require half as much  
128 oven heating time for nanoparticle hydrolysis, the associated life cycle impacts reduced  
129 by 0%–23% of the base case. If methods for the synthesis of the parent AX resin could be  
130 improved such that the environmental impact of their synthesis were cut in half, the life  
131 cycle impacts of Ti-AX and Fe-AX lowered by 6%–50% of the base case. If electricity  
132 generation methods were be improved to cut the impacts in half, the life cycle impacts of  
133 the nanocomposite sorbents reduced by 0%–42%.

134         If Brazilian electricity generation was considered, the change in life cycle impacts  
135 of the nanocomposite sorbents ranged from reducing by 79% to increasing by 8%  
136 compared to using US electricity, with a median change of 23% reduction. If German  
137 electricity generation is used the impacts reduced by 0%–63%, with a median 15%  
138 reduction. If a Chinese electricity generation mix is used, the impacts changed ranging  
139 from a 66% decrease to a 102% increase compared to using US electricity generation  
140 with a median 9% increase. Ecotoxicity and non-cancer human toxicity were reduced for  
141 all sorbents by using Chinese electricity compared to US, and the largest comparative  
142 increases in impacts were in human respiratory effects and ocean acidification.

143

144

| Sorber         | Freundlich Isotherm Parameters |      |                |       |      |                | Removal Capacity     |                                       |                                       | Sorber Required (kg) |
|----------------|--------------------------------|------|----------------|-------|------|----------------|----------------------|---------------------------------------|---------------------------------------|----------------------|
|                | Cr                             |      |                | As    |      |                | Ce ( $\mu\text{M}$ ) | Q <sub>Cr</sub> ( $\mu\text{mol/g}$ ) | Q <sub>As</sub> ( $\mu\text{mol/g}$ ) |                      |
|                | K                              | 1/n  | R <sup>2</sup> | K     | 1/n  | R <sup>2</sup> |                      |                                       |                                       |                      |
| Original Fe-AX | 1.50                           | 1.70 | 0.93           | 9.40  | 1.13 | 0.77           | 0.2                  | 9.5                                   | 2.3                                   | 5,272                |
| Improved Fe-AX | 9.68                           | 0.33 | 0.79           | 11.90 | 0.35 | 0.98           | 0.2                  | 5.7                                   | 6.8                                   | 3,044                |
| Ti-AX 24Hr     | 21.23                          | 0.35 | 0.70           | 10.82 | 0.18 | 0.42           | 0.2                  | 12.2                                  | 8.0                                   | 1,508                |
| Ti-AX 16Hr     | 10.59                          | 0.64 | 0.89           | 6.08  | 0.27 | 0.93           | 0.2                  | 3.8                                   | 3.9                                   | 4,614                |
| Ti-AX 8Hr      | 19.70                          | 0.43 | 0.70           | 13.96 | 0.49 | 0.64           | 0.2                  | 9.8                                   | 6.3                                   | 1,925                |
| Ti-AX 4Hr      | 16.92                          | 0.34 | 0.98           | 13.09 | 0.42 | 0.97           | 0.2                  | 9.8                                   | 6.7                                   | 1,810                |
| AX             | 17.27                          | 0.66 | 0.80           | n/a   | n/a  | n/a            | 0.2                  | 6.0                                   | n/a                                   | 2,917                |
| *MO            |                                |      |                |       |      |                |                      |                                       | 3.7                                   | 3,242                |

145

146

*SI Table 1:* Sorber data used to calculate mass required to treat the functional unit. K is in units of ( $\mu\text{mol/g})(\mu\text{M})^{-1/n}$ . \*MO

147

capacity was taken from (Westerhoff et al. 2005) and represents granular ferric hydroxide sorber in simulated groundwater.

148



| Indicator score                      | Resin Inventory | Methanol Inventory | Electricity Inventory | Resin Impact Factors | Methanol Impact Factors | Electricity Impact Factors | Comments                                                                                                                                                                                                                                                                                                                                                                                                              |
|--------------------------------------|-----------------|--------------------|-----------------------|----------------------|-------------------------|----------------------------|-----------------------------------------------------------------------------------------------------------------------------------------------------------------------------------------------------------------------------------------------------------------------------------------------------------------------------------------------------------------------------------------------------------------------|
| Reliability                          | 1               | 1                  | 1                     | 3                    | 3                       | 3                          | Inventory data measured, but impact assessment data comes from database with built in assumptions.                                                                                                                                                                                                                                                                                                                    |
| Completeness                         | 5               | 5                  | 5                     | 2                    | 2                       | 2                          | Inventory data collected from a single site over small period, with unexplored variations. Impact assessment data is largely national averages studied for more than one year.                                                                                                                                                                                                                                        |
| Temporal correlation                 | 1               | 1                  | 1                     | 4                    | 4                       | 3                          | Inventory data is from recently developed methods. Impact assessment data is from the 2010 database, but were actually collected between 1994-2004.                                                                                                                                                                                                                                                                   |
| Geographical correlation             | 2               | 2                  | 2                     | 3                    | 3                       | 2                          | Inventory data is from locally developed methods. Impact assessment data is largely European averages, except for electricity which is US average.                                                                                                                                                                                                                                                                    |
| Further technological correlation    | 1               | 1                  | 1                     | 4                    | 3                       | 3                          | Though the methanol production process has not drastically changed, adoption of underground natural gas mining has likely changed acquisition of raw material for it. This resin is for a type 1 strong base anion exchange resin of polystyrene and divinylbenzene crosslinking which is a common method, but other widely varied technologies exist. Electricity generation technology has not drastically changed. |
| Sample Size                          | 4               | 4                  | 4                     | 5                    | 3                       | 3                          | Inventory data repeated few times in laboratory setting. Impact assessment data for methanol and electricity collected from nation wide reports.                                                                                                                                                                                                                                                                      |
| Basic Uncertainty Factor             | 1.05            | 1.05               | 1.05                  | 3                    | 3                       | 3                          | Inventory uses process emissions for demand of electricity or products. Impact assessment data uses process emissions to air for polyromantic hydrocarbons as controlling                                                                                                                                                                                                                                             |
| Squared Geometric Standard Deviation | 1.24            | 1.24               | 1.24                  | 3.33                 | 3.11                    | 3.07                       |                                                                                                                                                                                                                                                                                                                                                                                                                       |

149

150

151

152

*SI Table 2.* Data Quality Assessment. The inventory and impact assessment factor quality for the three highest contributing items were analyzed. A score of 1 represents the data used has high reliability, and a score of 5 represents low reliability. These are converted to uncertainty factors and combined to produce a squared geometric standard deviation.

|                                | Acidification<br>(moles H <sup>+</sup><br>Eq) | Ecotoxicity<br>(kg 2,4-D Eq) | Eutro-<br>pication<br>(kg N) | Global<br>Warming<br>(kg CO <sub>2</sub> Eq) | Ozone<br>Depletion<br>(kg CFC-11<br>Eq) | Photo-<br>chemical<br>Oxidation<br>(kg NO <sub>x</sub><br>Eq) | Carcin-<br>ogenics (kg<br>Benzene<br>Eq) | Non-<br>Carcinogenics<br>(kg Toluene<br>Eq) | Respiratory<br>Effects<br>(kg PM <sub>2.5</sub><br>Eq) |
|--------------------------------|-----------------------------------------------|------------------------------|------------------------------|----------------------------------------------|-----------------------------------------|---------------------------------------------------------------|------------------------------------------|---------------------------------------------|--------------------------------------------------------|
| Original<br>Fe-AX<br>Synthesis | 7.89E-01                                      | 1.03E+00                     | 2.15E-03                     | 6.54E+00                                     | 1.73E-04                                | 8.92E-03                                                      | 1.26E-02                                 | 1.79E+01                                    | 3.10E-03                                               |
| Original<br>Fe-AX<br>Disposal  | 9.58E-02                                      | 1.07E-01                     | 1.82E-04                     | 1.50E+00                                     | 1.09E-08                                | 1.75E-03                                                      | 2.76E-03                                 | 3.94E+00                                    | 2.61E-04                                               |
| Improved<br>Fe-AX<br>Synthesis | 9.38E-01                                      | 1.04E+00                     | 2.16E-03                     | 6.57E+00                                     | 1.73E-04                                | 9.10E-03                                                      | 1.28E-02                                 | 1.82E+01                                    | 3.79E-03                                               |
| Improved<br>Fe-AX<br>Disposal  | 9.58E-02                                      | 1.07E-01                     | 1.82E-04                     | 1.50E+00                                     | 1.09E-08                                | 1.75E-03                                                      | 2.76E-03                                 | 3.94E+00                                    | 2.61E-04                                               |
| Original<br>Ti-AX<br>Synthesis | 1.88E+00                                      | 2.56E+00                     | 2.08E-03                     | 7.55E+00                                     | 1.72E-04                                | 1.28E-02                                                      | 1.42E-02                                 | 2.39E+01                                    | 7.55E-03                                               |
| Original<br>Ti-AX<br>Disposal  | 7.25E-02                                      | 2.69E-02                     | 1.63E-04                     | 1.34E+00                                     | 7.69E-09                                | 1.45E-03                                                      | 2.72E-03                                 | 2.99E+00                                    | 1.42E-04                                               |
| Improved<br>Ti-AX<br>Synthesis | 1.06E+00                                      | 9.76E-01                     | 1.79E-03                     | 5.24E+00                                     | 1.72E-04                                | 8.40E-03                                                      | 1.06E-02                                 | 1.41E+01                                    | 4.27E-03                                               |
| Improved<br>Ti-AX<br>Disposal  | 7.25E-02                                      | 2.69E-02                     | 1.63E-04                     | 1.34E+00                                     | 7.69E-09                                | 1.45E-03                                                      | 2.72E-03                                 | 2.99E+00                                    | 1.42E-04                                               |

153

154

*SI Table 3.* Proposed impact factors for 1 kg of Fe-AX and Ti-AX according to synthesis phase and disposal phase.

155

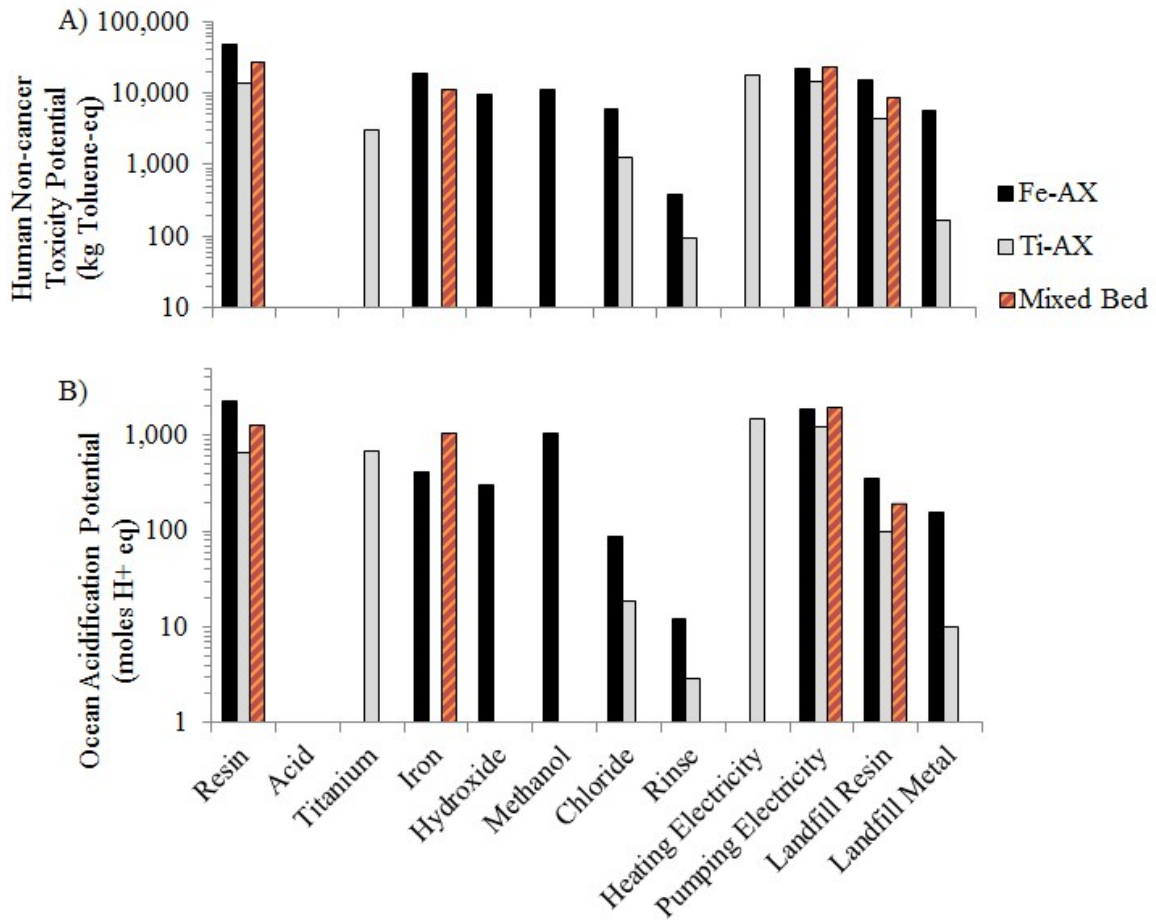

156

157 *SI Figure 1. Hotspot analysis of original Fe-AX, original Ti-AX, and mixed bed*

158 showing impact contributions of individual inventory items to A) human non-

159 carcinogenic toxicity potential and B) ocean acidification potential.

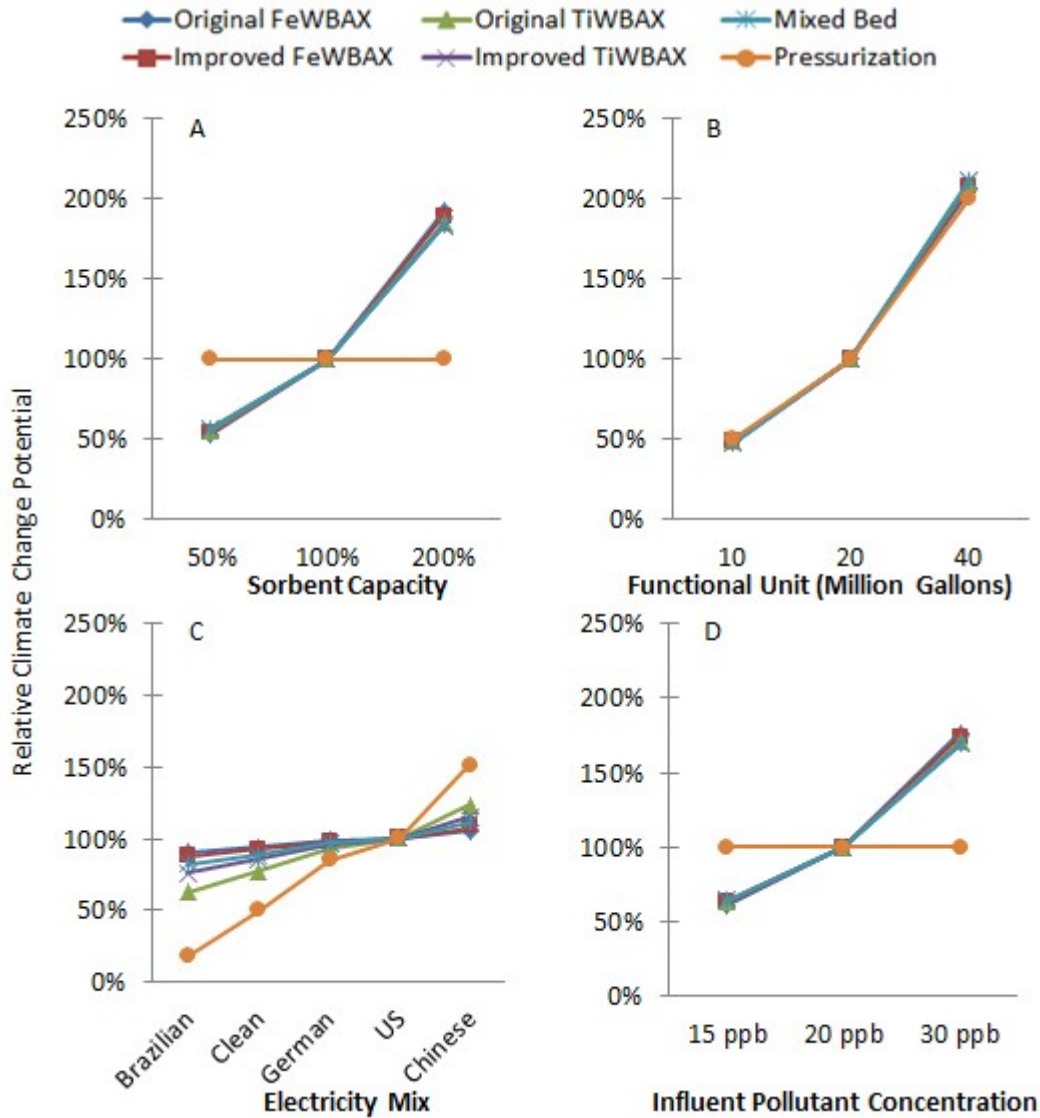

160

161

*SI Figure 2.* Sensitivity analysis depicting how a change in model inputs changes

162 the resultant climate change potential. Includes if A) the sorbent capacity is halved or

163 doubled, B) the functional unit is halved or doubled, C) if a different electricity mix is

164 chosen (including a theoretical “Clean” energy mix with impacts for electricity halved

165 compared to the base case), and D) if the influent pollutant concentration is halved or

166 doubled.

167

- 169 NSF International Standard/ American National Standard. (2007) Drinking Water  
170 Treatment Units - Health Effects, NSF International, Ann Arbor, MI.
- 171 Raluy, G., Serra, L. and Uche, J. (2005) Life Cycle Assessment of Water Production  
172 Technologies – Part 1: Life Cycle Assessment of Different Commercial  
173 Desalination Technologies. *International Journal of Life Cycle Assessment* 10(4),  
174 285-293.
- 175 Rohm & Haas Company (2008) Product Data Sheet: Amberlite PWA7 Resin, p. PDS  
176 0768 A.
- 177 Stokes, J. and Horvath, A. (2006) Life Cycle Energy Assessment of Alternative Water  
178 Supply. *International Journal of Life Cycle Assessment* 11(5), 335-343.
- 179 Stokes, J. and Horvath, A. (2011) Life Cycle Assessment of Urban Water Provision: Tool  
180 and Case Study in California. *Journal of Infrastructure Systems* 17(1), 15-24.
- 181 Westerhoff, P., Highfield, D., Badruzzaman, M. and Yoon, Y. (2005) Rapid Small Scale  
182 Column Tests for Arsenate Removal in Iron Oxide Packed Bed Columns. *Journal*  
183 *of Environmental Engineering* 131(2), 262-271.
- 184
